1 Title: A Multi-Omics Human Liver Organoid Screening Platform for DILI Risk Prediction

2  
3 **Authors:** Charles J. Zhang<sup>1</sup>, Matthew J. O’Meara<sup>2</sup>, Sophia R. Meyer<sup>1</sup>, Sha Huang<sup>3</sup>, Meghan M. Capeling<sup>3</sup>,  
4 Daysha Ferrer-Torres<sup>3</sup>, Charlie J. Childs<sup>4</sup>, Jason R. Spence<sup>3,4</sup>, Robert J. Fontana<sup>3\*</sup>, Jonathan Z. Sexton<sup>1,3,5\*</sup>

5 **Affiliations:**

6 <sup>1</sup>Department of Medicinal Chemistry, College of Pharmacy, University of Michigan, Ann Arbor, MI, 48109,  
7 USA

8 <sup>2</sup>Department of Computational Medicine and Bioinformatics, University of Michigan, Ann Arbor, MI, 48109,  
9 USA

10 <sup>3</sup>Department of Internal Medicine, Gastroenterology and Hepatology, Michigan Medicine at the University of  
11 Michigan, Ann Arbor, MI, 48109, USA.

12 <sup>4</sup>Department of Cell and Developmental Biology, University of Michigan, Ann Arbor, MI, 48109, USA.

13 <sup>5</sup>U-M Center for Drug Repurposing, University of Michigan, Ann Arbor, MI, 48109, USA

14 \*Corresponding author [jzsexton@med.umich.edu](mailto:jzsexton@med.umich.edu)

15 **ORCID IDs:**

16 CJZ: 0000-0003-0300-849X

17 MJO: 0000-0002-3128-5331

18 SRM: 0000-0002-7301-8370

19 SH: NA

20 MMC: 0000-0003-0310-123X

21 DFT: 0000-0002-3576-0347

22 CJC: 0000-0002-4480-2625

23 JRS: 0000-0001-7869-3992

24 RJF: 0000-0001-9161-5892

25 JZS: 0000-0002-9244-5888

26 **Classification: Biological Sciences - Medical Sciences**

27 **Keywords:** DILI, microfluidic devices screening, liver organoids

28 **Abbreviations:**

29 DILI: drug-induced liver injury

30 ALT: alanine aminotransferase

31 HLO: human liver organoid

32 iPSC: induced-pluripotent stem cells

33 HLA: human leukocyte antigen

34 PaDLOC: patient-derived liver-on-chip

35 scRNAseq: Single cell RNA sequencing

36 **Conflicts of interest:** The authors declare no conflicts of interest.

## 37 **Abstract**

### 38 Background and Aims

39 Drug-induced liver injury (DILI) is a prominent failure mode in drug development resulting in clinical trial  
40 failures and post-approval withdrawal. Improved *in vitro* models for DILI risk prediction that can model diverse  
41 genetics are needed to improve safety and reduce high attrition rates in drug development. In this study, we  
42 evaluated the utility of human liver organoids (HLOs) for high-throughput DILI risk prediction and in an organ-  
43 on-chip system. The recent clinical failure of inarigivir soproxil due to DILI underscores the need for improved  
44 models.

### 45 Methods

46 HLOs were adapted for high-throughput drug screening in dispersed-cell 384-well format and a collection of  
47 DILI-associated drugs were screened. HLOs were also adapted to a liver-chip system to investigate enhanced  
48 *in vivo*-like function. Both platforms were benchmarked for their ability to predict DILI using combined  
49 biochemical assays, microscopy-based morphological profiling, and transcriptomics.

### 50 Results

51 Dispersed HLOs retained DILI predictive capacity of intact HLOs and are amenable to high-throughput  
52 screening allowing for measurable IC<sub>50</sub> values for cytotoxicity. Distinct morphological differences were  
53 observed in cells treated with drugs exerting differing mechanisms of action. HLOs on chips were shown to  
54 increase albumin production, CYP450 expression and also release ALT/AST when treated with known DILI  
55 drugs. Importantly, HLO liver chips were able to predict hepatotoxicity of tenofovir-inarigivir and showed  
56 steatosis and mitochondrial perturbation via phenotypic and transcriptomic analysis.

## 57 Conclusions

58 The high throughput and liver-on-chip system exhibit enhanced *in vivo*-like function and demonstrate the utility  
59 of the platforms in early and late-stage drug development. Tenofovir-inarigivir associated hepatotoxicity was  
60 observed and highly correlates with the clinical manifestation of DILI.

## 61 Introduction

62 Drug-induced liver injury (DILI) is an infrequent but important cause of both acute and chronic liver disease.<sup>1,2</sup>  
63 An estimated 22% of clinical trial failures and 32% of market withdrawals of therapeutics are due to  
64 hepatotoxicity, highlighting the role of the liver as a significant site of adverse drug reactions leading to drug  
65 failure.<sup>3,4</sup> This potential hepatotoxicity creates an increased risk for clinical trial participants as well as a  
66 financial burden in drug development. Hepatotoxicity is usually not detected in preclinical or clinical studies but  
67 instead is observed only in the clinic or post-marketing settings. These toxicities are termed “idiosyncratic,”  
68 since they are largely independent of the dose and duration of drug use and develop in only a small proportion  
69 of treated patients for as-yet unclear reasons. As there are currently over 1000 prescription medications  
70 and >100,000 herbal and dietary supplements (HDS) available for use in the United States, with 45% of all

71 Americans reported taking at least one prescription medication in the past month and 11% reported taking more  
72 than 5 prescriptions<sup>5</sup>, the potential for synergistic liver toxicity is high.

73 Recently, Spring Bank Pharmaceuticals was investigating inarigivir soproxil (GS-9992), an oral  
74 immunomodulator that inhibits retinoic acid-inducible gene I (RIG-I) protein leading to enhanced intracellular  
75 IFN signaling pathways against Hepatitis B (HBV).<sup>6</sup> Inarigivir monotherapy and in combination with tenofovir  
76 alafenamide (TAF) was evaluated at a daily dose of 25 to 900 mg and showed no clear signs of toxicity in two  
77 clinical trials for HBV; a phase-1 monotherapy study in non-cirrhotic, treatment-naive subjects with HBV  
78 (NCT04059198) and a phase-2 study of inarigivir/TAF in chronic HBV subjects (NCT03434353). However, a  
79 phase-2 inarigivir/TAF study identified severe DILI in 7 of 42 patients given the combination of both drugs  
80 after 16 weeks of therapy, thus leading to the halt of the phase-2 trial. All 7 patients had an elevated alanine  
81 aminotransferase (ALT) after 16 weeks of therapy, 4 of the 7 had associated hyperbilirubinemia, and one  
82 subject died due to multiorgan system failure with lactic acidosis and evidence of hepatic steatosis in their liver  
83 suggestive of possible mitochondrial toxicity.<sup>7</sup>

84 This clinical trial failure underscores the need for high fidelity pre-clinical DILI risk prediction. The challenge  
85 in determining DILI risk assessment arises from the lack of pre-clinical systems that model the physiologic  
86 functions of the human liver. Common *in vitro* models include hepatocellular carcinoma-derived cell lines  
87 (HepG2, Huh7, HepaRG, etc.), which do not recapitulate hepatocyte function and assume that DILI is a  
88 hepatocyte-cell autonomous effect.<sup>8</sup> An alternative is primary human hepatocyte (PHH) cell cultures, which  
89 retain hepatocyte function but whose metabolic function declines rapidly and varies greatly between cadaveric  
90 fresh and cryopreserved samples.<sup>9</sup> PHH cultures are also costly to scale for the high-throughput screening  
91 necessary to enable large-scale screening for DILI-risk.<sup>10</sup> Modeling human liver injury in laboratory animals is

92 also not scalable and often proves inadequate due to species differences between humans, dogs, and rodents and  
93 an overall lack of mechanistic understanding of idiosyncratic DILI.<sup>11,12</sup>

94 To meet this challenge, we explored the use of human liver organoids (HLO) as a more physiologically  
95 organotypic system for recapitulating DILI in vitro, with added adaptations for high-throughput screening. We  
96 started with a previously-developed protocol for derivation of human liver organoids from induced pluripotent  
97 stem cells (iPSC) and adapted their use for high-throughput drug screening in both 384-well plates and in a  
98 liver-chip system for enhanced physiological fidelity.<sup>13</sup> HLOs consist primarily of hepatocytes but also include  
99 non-parenchymal stellate and Kupffer cells, and all of the cells arise from the same individual donor.<sup>14</sup> In this  
100 study, we adapted the HLOs for high-throughput screening and an organ-on-chip system (Emulate Bio)<sup>15</sup> to  
101 compare and contrast specific endpoints, including iPSC-hepatocyte maturity and drug responsiveness, across  
102 the two platforms. Liver chips have been previously used to successfully predict species-specific DILI in  
103 primary hepatocytes;<sup>12</sup> by validating the iPSC-derived liver organoid chip system, we would then be able to  
104 assess patient-specific DILI.

105 Due to the complexity of DILI, we developed an integrated multi-omics platform including biomarker/analyte  
106 detection, phenotyping of the cell population with high content imaging, and single-cell RNA sequencing to  
107 deliver a comprehensive platform for dissection of DILI mechanisms and to enable personalized DILI risk  
108 prediction. In this study, we performed scRNA sequencing transcriptomics and morphological cell profiling to  
109 supplement the liver chip endpoints to suggest a possible mechanism of action of tenofovir-inarigivir  
110 hepatotoxicity. Our efforts have demonstrated the potential of dispersed HLOs for rapid 384-well based  
111 compound DILI-risk screening, and also the validation of a patient-derived liver-on-chip (PaDLOC) system for  
112 a more intricate, but lower throughput, model for DILI.

## 113 **Materials and Methods**

### 114 *Human liver organoid culture and dispersion*

115 Human iPSC line 72.3 was obtained from Cincinnati Children's Hospital Medical Center<sup>16</sup> and differentiated  
116 into HLOs based on a previously described protocol.<sup>13,14</sup> In brief, iPSCs were grown to 90% confluency on  
117 Matrigel (Corning, 354234) in 6-well plates. Cells were then treated with Activin A (R&D Biosystems, 338-  
118 AC) for 3 days and FGF4 (purified in house<sup>17</sup>) for 3 additional days to form definitive endoderm spheroids.  
119 Spheroids were embedded in Matrigel and treated with retinoic acid for 4 days followed by Hepatocyte Culture  
120 Medium BulletKit (Lonza, CC-3198) supplemented with hepatocyte growth factor (PeproTech, 100-39) for 12  
121 days.

122 HLOs were then taken out of Matrigel by treatment with dispase (0.2 mg/mL) for 10 minutes and washed with  
123 DMEM/F12 (ThermoScientific, 11320033) with centrifugation at 300 x g for 3 minutes to pellet between  
124 washes. To achieve a single cell suspension, cells were treated with trypsin (0.25%) (Invitrogen, 25200056) and  
125 incubated at 37 °C for 10 minutes, mechanically dissociated by pipetting, and incubation for an additional 10  
126 minutes. Trypsin was quenched with 100% FBS and washed 3 times with DMEM/F12.

### 127 *PaDLOC Culture and Compound Treatment*

128 Dispersed cells were transferred to the Chip S1<sup>TM</sup> based on the co-culture Liver-Chip Culture Protocol as  
129 described by Emulate Bio.<sup>18</sup> In brief, both channels of the S1 are first activated with the manufacturer's ER-1  
130 solution and UV treatment. Activated chips are then washed with cold PBS (ThermoFisher Scientific,  
131 10010023) and both channels were coated with an extracellular matrix consisting of collagen I (100 µg/mL)

132 (Corning, 354249) and fibronectin (25 µg/mL) (ThermoScientific, 33010018) at 4 °C overnight followed by 1  
133 hr at 37 °C.

134 Extracellular matrix coating was then washed off with hepatocyte growth media before use. Dispersed HLOs  
135 were concentrated to a density of  $4 \times 10^6$  cells/mL. 50 µL of cell suspension was quickly pipetted into the top  
136 channel to allow even dispersion and cultured static (no media flow) at 37 °C for 8 hrs for attachment to the  
137 semi-permeable membrane. Next, 30 µL of cell suspension was seeded into the bottom channel and the chip  
138 immediately flipped over to allow attachment to the membrane, on the bottom layer. Again, cells were left to  
139 attach for 8 hrs at 37 °C. Both channels were then gravity washed with hepatocyte growth media de-gassed with  
140 a 0.45 µm Steriflip-HV Sterile Centrifuge Tube Top Filter Unit (MilliporeSigma, SE1M003M00).

141 Each seeded Chip S1 was then attached to a respective Pod<sup>TM</sup> Portable Module. De-gassed hepatocyte growth  
142 media was used to fill the inlet reservoirs for both the top and bottom channels. Loaded Pods were then placed  
143 into the Zoë<sup>TM</sup> Culture Module at 37 °C. All chips then underwent a regulate cycle followed by a constant flow  
144 rate of 30 µL/hr of the reservoir's media for each of both channels. Flow is modulated by an Orb<sup>TM</sup> Hub  
145 Module. Media outflow collected in respective reservoirs was obtained for albumin, ALT, AST, and LDH  
146 quantification. Fresh de-gassed hepatocyte growth media was added into the inlet reservoirs every 2 days. Cells  
147 were cultured on this system for 7 days before treatments.

148 After 7 days, residual hepatocyte growth media was aspirated and replaced with hepatocyte growth factor  
149 containing either 0.1% DMSO, APAP (100 µM), FIAU (1 µM), tenofovir (500 nM), inarigivir soproxil (500  
150 nM), or tenofovir and inarigivir soproxil (250 nM and 250 nM). The flow rate was maintained as prior for an  
151 additional 7 days and outflow media was collected pre-treatment and days 1, 3, and 7 for albumin, ALT, AST,  
152 and LDH quantification.

153 *Dispersed 384-well HLO culture and drug delivery*

154 Dispersed HLOs were seeded in collagen type 1-coated CellCarrier-384 Ultra Microplates (PerkinElmer,  
155 6057308) at a seeding density of 8,000 cells/well in hepatocyte growth media. Cells were left to adhere and  
156 culture for 48 hrs before treatment with compounds. For screening, compounds were dispensed in 10-point  
157 dose-response from 2 nM to 500  $\mu$ M using an HP D300e Digital Dispenser. For tenofovir-inarigivir synergy  
158 assessment, tenofovir, inarigivir sorpoxil, and in combination were dispensed in triplicate with 12-point dose-  
159 response curves in 1/3 dilutions starting with a high of 500  $\mu$ M. Cells were then incubated for 72-hours before  
160 fixation and staining.

161 *Single-cell transcriptomics*

162 Single-cell RNA sequencing was performed on dispersed HLOs and PadLOCs using the Illumina NovaSeq  
163 platform for vehicle controls and cells treated with fialuridine, tenofovir, and tenofovir-inarigivir in  
164 combination. Each sample generated between 440 and 860 million barcoded reads corresponding to an  
165 estimated 4,600 to 25,000 cells per sample (SI [scRNAseq\\_metric\\_summary.xls](#)). Transcripts were mapped to  
166 the GRCh38 2020-A (GENCODE v32/Ensembl 98) (July 7th, 2020) reference transcriptome<sup>19</sup> using 10x  
167 Genomics Cell Ranger 5.0.1,<sup>20</sup> where between 45% and 58% of reads per sample confidently map to the  
168 transcriptome, yielding between 500 and 4,700 median genes per cell. As a quality filter, genes were excluded if  
169 they were only detected in 5 or fewer cells, and cells were excluded if over 30% of reads were mitochondrial or  
170 if they had fewer than 10,000 total reads. Except for inarigivir, where only 170 cells passed quality control,  
171 between 1,700 and 4,400 cells were retained for each sample. Given that hepatocytes may be binucleated,<sup>21</sup> we  
172 did not remove doublets.



173 To estimate differential expression, we first correct for over-dispersion using sctransform v2<sup>22</sup> with Seurat v4<sup>23</sup>  
174 which fits a robust negative binomial model for the per-gene variance by the expression mean. We then used  
175 DESeq2 to compute the average log fold-change and adjusted p-value for each gene between cells under  
176 different conditions.<sup>24</sup>

177 To visualize and cluster cells with distinct phenotypes, we used UMAP non-linear dimensionality reduction<sup>25</sup> in  
178 monocle3.<sup>26</sup> Expression values were normalized by dividing by per-cell size factors, adding a pseudo-count of  
179 1, and taking the natural log; reducing the dimensionality with principal component analysis to 100 dimensions;  
180 and then applying the UMAP algorithm implemented in uwot<sup>27</sup> using the monocle3 default arguments:  
181 similarity="cosine", min\_dist=0.1, n\_neighbors=15. To estimate clusters, we applied the Leiden modularity  
182 algorithm<sup>28</sup> to the gene UMAP coordinates setting the resolution of  $1e^{-4}$  when embedding the untreated  
183 PaDLOC and HLO samples, and a resolution of  $1e^{-5}$  when embedding the PaDLOC samples and default  
184 parameters otherwise.

### 185 *Image Acquisition*

186 384-well cultures and intact organoids (transferred to 384-well plates) were imaged on a Yokogawa  
187 CellVoyager 8000 High-Content Screening System and maximum intensity projection images were acquired for  
188 with  $1\mu\text{m}$  Z-spacing and  $15\mu\text{m}$  depth. PaDLOCs were imaged with a Yokogawa CQ1 Benchtop High-Content  
189 Analysis System with  $1\mu\text{m}$  sections through  $100\mu\text{m}$  with both upper and lower chip compartments imageable.

### 190 *Cell Morphological Profiling and Data Analysis*

191 Multi-channel fluorescence images were analyzed with CellProfiler 4.2.0. Individual nuclei were first identified  
192 using Otsu thresholding and segmentation. The entire cell was delineated using the nucleus as a seed object and

193 dilation to the extent of the cell boundary and enabled measurements of fluorescent intensity, intensity  
194 distribution, texture, size, and shape from the respective regions in each fluorescent channel. For 384-well  
195 biomarker immunofluorescence assays, cells were stained with Hoechst 33342 (ThermoFisher Scientific,  
196 H3570), CEBPA (MilliporeSigma, HPA052734), VIM (ThermoFisher Scientific, 14989782), and CD68  
197 (Abcam, ab53444) or with Hoechst 33342, ASGR1 (ThermoFisher Scientific, MA140244) and  $\alpha$ SMA (Abcam,  
198 ab21027). For 384-well hepatotoxicity assays, plates were stained with Hoechst 33342, MitoView Green  
199 (Biotium, 70054), HCS CellMask Orange(ThermoFisher Scientific, H32713), and HCS LipidTox Deep Red  
200 (ThermoFisher Scientific, H34477). PaDLOCs were stained with Hoechst 33342, HCS CellMask Orange, and  
201 HCS LipidTox Deep Red.

202 The resulting data set includes hundreds of measurements on a per-cell level with necessary metadata relating  
203 each cell to their respective field, well, and plate. Cell viability across compound dose-range was obtained  
204 based on the number of identified cells per condition with the DMSO vehicle-treated control as the 100%  
205 viability reference. For UMAP-embedding, measurements for each feature were centered at zero and scaled  
206 with Z-score=1. Features with low variance were omitted. UMAP embedding was done with the Python umap-  
207 learn package.<sup>29</sup>

208 Random forest model training and prediction were done with KNIME.<sup>30,31</sup> In brief, the cell-feature matrix was  
209 centered/scaled and low variance features were omitted and highly correlated features (>95%) were also  
210 omitted. Data was then split into training and test sets with an 80/20 split and model performance were  
211 evaluated on the test set and the model was found to have an accuracy of >90%. After training/testing, the  
212 model was deployed to score the entire dataset.

## 213 Results

### 214 *Use of Dispersed HLOs in 384-well Based High-Content Screening*

215 We generated HLOs from iPSC line 72.3 by culturing iPSCs to definitive endoderm spheroids through a 6-day  
216 differentiation.<sup>14,32</sup> Spheroids were then embedded into Matrigel (Corning, 354234) and cultured in media  
217 containing hepatocyte growth factor for 15 additional days (Figure 1A). 3D confocal immunofluorescence  
218 imaging was then performed to verify the presence of liver-specific cell types, using Hoechst 33342 to stain for  
219 nuclei, anti-CEBPA, and anti-ASGR1 to identify hepatocytes, VIM, and  $\alpha$ SMA to identify stellate cells, and  
220 CD68 to identify Kupffer cells (Figure 1B). Hepatic stellate cells and Kupffer cells are well established in the  
221 etiology of liver injury from inflammatory stress<sup>33</sup> and the concomitant development of fibrosis.<sup>34</sup>

222 Intact HLOs have been shown to recapitulate cytotoxicity of known hepatotoxic drugs.<sup>35</sup> However, the  
223 scalability of 3D HLOs for drug screening is not optimal and translation to high-throughput screening is a  
224 significant challenge. Dispersing HLOs into 384-well monolayer cultures allows for homogenous drug  
225 exposure, homogenous cell-type distribution, and morphologic characterization and adaptation for high content  
226 screening in 384-well format.<sup>36</sup> Although we have been able to disperse iPSC-based organoids into 384-well  
227 plate cultures and observed retention of tissue-specific markers and function,<sup>37</sup> loss of cell identity (de-  
228 differentiate) and organotypic responsiveness to drugs was of concern. Here, we dispensed 3,500 dispersed  
229 HLO cells/well in 384-well plates and observed slow proliferation across 7-days (Supplementary Figure 1A)  
230 while they retained cell-type-specific markers, albumin production, and CYP 450 expression (Figure 2A,  
231 Supplementary Figure 1 B-C) at day 7 of culture. This indicates that they retain physiologic functions in the  
232 dispersed state. CellProfiler 4.2.0<sup>38</sup> was used to segment cells using nuclei staining and measure the intensity  
233 and distribution of each marker on a per-cell level to check for marker positivity. 59.7% were positive for

234 CEBPA, 35.6% for VIM, 0.19% for CD68 and 4.58% for neither (Supplementary Figure 1A-B). These cell  
235 ratios match previously determined cell distribution through scRNAseq.<sup>14</sup>

236 To test the feasibility of using these dispersed HLOs as a DILI screening platform, we performed assay  
237 development and screened a collection of DILI-associated drugs and probes that produce liver toxicity in other  
238 systems. Compounds were tested in 10-point/2-fold dilution concentration-response format in optical-bottom  
239 384-well plates with fialuridine (FIAU) as a positive control and DMSO vehicle control. We measured cell  
240 viability by reductions in cell counts (relative to the vehicle control) and morphological perturbation as a tool to  
241 classify compounds by their phenotypic signature and to impute their mechanism of action by similarity to  
242 compounds with known mechanisms of action. 12 compounds showed clear dose-responsive loss of cell  
243 viability with IC<sub>50</sub> values between 150 nM - 31.4 μM. Huh7 and dispersed definitive endoderm were counter-  
244 screened in the same manner and neither exhibited overt cytotoxicity (Figure 2B), establishing that HLOs  
245 exhibit hepatocyte-specific metabolism and response to drugs.

#### 246 *Morphologic profiling of DILI compound effects in dispersed 384-well culture.*

247 To characterize the drug-induced perturbation of single-cells in response to 12 hepatotoxic drugs from 384-well  
248 plate screening, we used CellProfiler 4.2.0 to segment and extract 845 features per cell to generate a cell-by-  
249 feature matrix. The dimensionality of the feature vector was reduced to 2-dimensions using the uniform  
250 manifold approximation and projection (UMAP) method<sup>29</sup> and hierarchical density-based clustering was  
251 performed with HDBScan<sup>39</sup> to characterize and cluster drug treatments by their resulting phenotypic  
252 perturbation. We observe three distinct clusters within this embedding (Figure 2C, Supplementary Figure 2).  
253 Cluster  $\alpha$  consists largely of allopurinol, tamoxifen, and thioguanine-treated cells, all thought to cause DILI  
254 through an immunological response to their metabolites. Cluster  $\beta$  contains cells treated with

255 nucleotide/nucleoside analogs and consists mainly of cells treated with propylthiouracil, and to a lesser extent,  
256 stavudine, and thioguanine-treated cells. Lastly, Cluster  $\gamma$  contains a majority of cells treated with allopurinol  
257 and tamoxifen as in Cluster  $\beta$ , but with a major presence of nevirapine and rifampin which are thought to cause  
258 DILI through CYP450 modulation. With other compounds, less pronounced clustering was observed  
259 (Supplementary Figure 2).

260 *Biochemical, phenotypic, and transcriptomic analysis of HLOs in an Organ-on-a-Chip System - iPSC Liver*  
261 *Chips*

262 At day 21 of differentiation, HLOs were dispersed into a single-cell suspension and seeded in both upper and  
263 lower compartments of a dual-compartment microfluidic S1 chip (Emulate Bio), and cultured for an additional  
264 7 days to develop a patient-derived liver-on-chip (PaDLOC). The dual-compartment microfluidic S1 chip was  
265 previously used for long-term culture and maintenance of primary hepatocytes<sup>40</sup>. Primary hepatocytes on this  
266 system were shown to respond to DILI-causing compounds and recapitulate species-specific toxicity over the  
267 current preclinical standard models.<sup>12</sup>

268 First, while intact HLOs were shown to produce 6.74  $\mu\text{g}/\text{mL}$  albumin per  $10^6$  cells with slight diminishment  
269 after 7 days of culture, PaDLOCs released more albumin to a rate of 30.9  $\text{ug}/\text{mL}$  per  $10^6$  cells (Figure 3A). This  
270 is comparable to albumin production by primary hepatocytes cultured on the same chip system.<sup>11</sup> PaDLOCs  
271 also express CYPs 1A1, 2D6, and 3A4 at 4-5 fold higher levels as compared to intact HLOs and 100-fold  
272 higher levels than immortalized liver cell lines Huh7 or Ph5 (Figure 3B). Lastly, PaDLOCs exposed to media  
273 containing BSA-conjugated oleate were shown to accumulate lipid, producing a steatotic state (Supplementary  
274 Figure 4).

275 scRNA sequencing of HLO cells was performed using the Illumina NovaSeq platform to confirm the presence  
276 of hepatocytes in both PaDLOCs and HLOs, and also to compare the transcriptomic changes imparted by the  
277 on-chip culture system. Single-cell analysis was performed for comparisons of culture conditions (Figure 3G).  
278 A general increase in hepatocyte maturity/function was observed in PaDLOCs relative to HLOs. Differential  
279 expression analysis between all cells of HLO and PaDLOCs (Figure 3H) showed an increase of TGFBI  
280 (collagen binding) and CCN2 expression (cell adhesion) in PaDLOCs that are biomarkers of liver  
281 proliferation.<sup>41</sup> We also observed an increased expression of cytokine response/signaling, and corticosteroid  
282 response markers. Increased expression of hepatocyte-marker TDO2 was observed and is commonly correlated  
283 with increased CYPs 1A1 and 1A2<sup>42</sup> and ACTA2, a marker for activated stellate cells.<sup>43</sup> Other liver-specific  
284 markers demonstrating increased expression in PaDLOCs include NNMT,<sup>44</sup> and IGFBP7.<sup>45</sup> Enrichment  
285 analysis suggests an upregulation of cell structural components such as actin cytoskeleton organization, actin  
286 filament-based processes, and cytoskeleton organization. Enrichment also shows a general increase in  
287 inflammatory response elements (Supplementary Figure 5) (scRNAseq data is available at GEO).

### 288 *iPSC liver chips for DILI risk prediction*

289 Serum biomarkers for DILI include elevated ALT/AST<sup>46</sup> and diminished production of albumin.<sup>47</sup> These  
290 biomarkers correspond to hepatocellular injury and can be assayed similarly in liver-chip media effluent with  
291 acetaminophen (APAP) and filauridine (FIAU) as positive controls with differing mechanisms of action. APAP  
292 is metabolized by CYP450-mediated oxidation to NAPQI that exerts hepatotoxicity via the formation of  
293 covalent liver protein adducts at cysteine residues as 3-(cystein-S-yl)-APAP.<sup>48,49</sup> FIAU also causes  
294 hepatotoxicity by stimulating ectopic lipid accumulation and as a mitochondrial toxin.<sup>50,51</sup> From exposure to  
295 100  $\mu$ M of APAP, ALT increased from a basal level of 8 U/L at day 0 to a peak of 22 U/L at day 4 and a  
296 seeming recovery by day 7 with a reduction in both ALT and AST release (Figure 3C and D). Treatment with

297 10  $\mu$ M FIAU resulted in a drastic increase to over 80 U/L for both ALT and AST at 7-days after exposure with  
298 no indication of recovery in this period. Additionally, albumin production, a guiding biomarker for the  
299 diagnosis of DILI severity,<sup>47</sup> was stable in DMSO-treated PaDLOCs while its production was diminished in  
300 both APAP and FIAU-treated PaDLOCs (Figure 3E).

301 Importantly, DILI from APAP and FIAU manifest differently in the liver to differing mechanisms of action.  
302 The multifaceted nature of DILI-causing drugs presents a challenge for DILI-risk prediction for novel  
303 therapeutics. For example, APAP has been reported to cause hepatic necrosis<sup>52</sup> whereas FIAU causes diffuse  
304 microvesicular steatosis with retention of hepatic architecture.<sup>53</sup> PaDLOCs were treated with APAP and FIAU  
305 at 100  $\mu$ M and 10  $\mu$ M, respectively, before fixing and staining nuclei/cell regions and lipid droplets. Confocal  
306 images demonstrate that PaDLOCs treated with APAP resulted in a patchy loss of cell mask and shriveling of  
307 cells with no increased lipid accumulation as compared to control (Figure 3F). FIAU treated PaDLOCs  
308 however, showed high liquid accumulation and a reduction of CellMask staining suggestive of structural  
309 perturbation. Both PaDLOC observations for APAP and FIAU recapitulate the histological presentation and  
310 clinical phenotype of DILI in humans.

### 311 *Modelling Hepatotoxicity of Inarigivir Combinations*

312 The unexpected case of inarigivir soproxil-induced hepatotoxicity serves as a recent reminder of the need for  
313 improved pre-clinical assays for DILI risk assessment and serves as a suitable benchmark for both the 384-well  
314 HLO assay and the PaDLOC system. Cells in 384-well plates were treated with a 16-point dose range of  
315 tenofovir, TAF, inarigivir soproxil, and combinations thereof (tenofovir/inarigivir, and TAF/inarigivir). After 72  
316 hrs of treatment, cells were stained to delineate nuclei/cell regions and to quantitate the mitochondrial, and lipid  
317 phenotypes. Confocal images were taken for each treatment condition (n = 4 wells). Morphological features for

318 each cell channel were obtained on a per-cell level along with reductions in cell count (a measure of  
319 cytotoxicity, cell death, and detachment). 100% loss of cell viability was observed in both drug combinations  
320 (Figure 4A,  $IC_{50} = 56.9$  and  $31.9 \mu\text{M}$  for tenofovir/inarigvir and TAF/inarigivir respectively) while negligible  
321 cytotoxicity was observed for the monotherapies up to concentrations of  $100 \mu\text{M}$ . In addition to simple loss of  
322 cells, cytotoxicity was also measured by significant hepatocellular morphologic perturbation through  
323 multivariate analysis of cell features.<sup>54</sup> Random forest regression models between DMSO and FIAU treated  
324 controls were developed and used to score each cell on a predicted extent of FIAU exposure. These models  
325 were applied to all cells across all conditions, resulting in the ability to quantify hepatotoxicity through  
326 morphological features independent of cell count. Using this method, we observed minimal morphological  
327 perturbation of cells treated with either tenofovir variant individually as compared to DMSO-control with slight  
328 morphological perturbation for inarigivir treated cells. Morphologic perturbation analysis showed that both  
329 combinations resulted in pronounced cell morphologic perturbations like FIAU with  $IC_{50}$  of  $21.4$  and  $41.6 \mu\text{M}$   
330 for tenofovir and TAF respectively.

331 Tenofovir, tenofovir alafenamide (prodrug given in clinical trials), and inarigivir ( $500 \text{ nM}$ ) monotherapy all did  
332 not increase ALT or AST release after treatment and no morphological deviation from DMSO-treated control.  
333 However, the combination of tenofovir and inarigivir increased both ALT and AST starting at day 4 to an ALT  
334 level of  $22 \text{ U/L}$ , and further ALT increase to  $33 \text{ U/L}$  at 7 days of exposure and AST of  $29 \text{ U/L}$  and  $45 \text{ U/L}$   
335 respectively (Figure 4B and C). TAF and inarigivir also resulted in ALT increase to  $33 \text{ U/L}$  at 7 days and AST  
336 to  $42 \text{ U/L}$  but did not show a significant increase at day 4. Both combination treatments also resulted in a  
337 decrease in albumin production while no effect was observed in the single-agent treatments across the 7 days  
338 (Figure 4D).



339 Visually (Figure 4F), PaDLOCs treated with both combinations exhibited a remarkably similar phenotype to  
340 FIAU-treated controls and dissimilar to the APAP control. To quantify observations from confocal microscopy,  
341 we employed a cell morphological profiling-based approach in the same manner as in the 384-HLO system.  
342 These measured features were reduced via UMAP into a 2-dimensional projection (Figure 4E) and  
343 tenofovir/inarigivir-treated cells clustered closely with that of FIAU treatment while tenofovir and inarigivir  
344 single-agent treatments clustered closely with DMSO control. APAP treated cells exhibited a phenotype unlike  
345 either of the other groups and resulted in their unique cluster suggesting that this system is capable of  
346 categorizing DILI by the mechanism of action by comparison to known controls.

347 *Transcriptomic analysis of Tenofovir-Inarigivir, FIAU, APAP treated PaDLOCs*

348 scRNAseq was performed on drug-treated and control PaDLOCs on the Illumina NovaSeq platform to suggest  
349 possible MOA of synergistic hepatotoxicity. The concentration and duration of treatment were optimized using  
350 phenotypic endpoints to capture intermediate phenotypes rather than late-stage cell death. DMSO-treated  
351 controls, fialuridine (1  $\mu$ M), tenofovir (500 nM), and tenofovir/inarigivir (250 + 250 nM) combination were  
352 evaluated. Single-cell data was subset to the hepatocyte population based on known hepatocyte markers as  
353 listed in Figure 3G. Although phenotypically and clinically, tenofovir/inarigivir-induced hepatotoxicity shares  
354 similarities to that of fialuridine, our comparisons suggest a greater transcriptomic similarity between tenofovir  
355 monotherapy and fialuridine. First, UMAP re-embedding of the hepatocytes shows close clustering between  
356 fialuridine and tenofovir treatments. Volcano plots show that both conditions, compared to control, resulting in  
357 overexpression of KCNQ10T1 and NFIA, both related to gene expression regulation, and suppressed expression  
358 of RPS10.

359 Hepatocyte-specific differential expression analysis also suggests similar transcriptomic perturbation by  
360 fialuridine and tenofovir. Fatty acid, triglyceride, and lipid storage markers were of particular interest due to

361 observations through confocal microscopy. DGAT1, involved in triglyceride synthesis and storage<sup>55</sup>, is  
362 downregulated under both fialuridine and tenofovir treatment when expression under tenofovir/inarigivir  
363 combination treatment matches that of vehicle control (Figure 5C). PLIN4, thought to aid in lipid droplet  
364 accumulation in the liver,<sup>56</sup> is not detected in the vehicle control but increased in all other conditions (Figure  
365 5D). FABP4 is expressed consistently in all but the combination treatment (Figure 5E), conflicting with  
366 previous evidence that FABP4 is overexpressed in liver injury due to hepatocellular carcinoma.<sup>57-59</sup> However,  
367 other reports have shown that FABP4 knockdown results in greater adiposity in mice.<sup>60</sup>  
368 Across all treatments, we observe diminishment of NDUFA4 as compared to control (Figure 5F) suggesting  
369 impairment to oxidative phosphorylation commonly associated with DILI.<sup>61</sup> We also observed decreased  
370 expression of PRDX4 in all treatments (Figure 5G), and GSTP1 in fialuridine and tenofovir single treatments  
371 (Figure 5H), indicators of oxidative stress.<sup>62,63</sup> Based on these observations, and since tenofovir monotherapy  
372 does not present as DILI, the synergistic toxicity of tenofovir/inarigivir is likely to be caused by misregulation  
373 of triglyceride synthesis and storage in addition to oxidative phosphorylation impairment and oxidative stress.  
374 These findings serve as a basis for future studies which are necessary to confirm the mechanism of action.

## 375 Discussion

376 We have established that HLOs are a viable *in vitro* model for DILI risk prediction and are amenable to high-  
377 throughput screening and adaptation to a liver-chip system that further enhances their organotypic function.  
378 They exhibit physiologic similarities to human liver including; 1) production of cell types from the same host  
379 genetics including hepatocyte-like cells, stellates and Kupffer cells, 2) albumin production, and 3) cytochrome  
380 P450 expression that makes them useful for modeling drug metabolism. HLOs have enabled large-scale and  
381 high throughput DILI risk assessment due to their relative scalability and consistency as compared to primary  
382 human hepatocytes. Their application in 384-well format can serve as the basis for an early-stage preclinical

383 assessment of novel molecular entities. In addition to detecting a reduction in viability upon drug treatment,  
384 multiplexed high-content screening and morphological cell profiling can give robust multivariate outputs that  
385 can be used to cluster drugs by their phenotypic fingerprint to impute similar mechanisms of action to known  
386 compounds. For example, FIAU treatment at sub-cytotoxic concentrations results in perturbation of cells that  
387 are similar to those observed clinically including diminished mitochondrial mass and lipid accumulation  
388 (Supplementary Figure 3). Many of these single-endpoints however are not independently robust and do not  
389 allow for reliable  $IC_{50}$  determination. Machine learning-based multivariate analysis, in this case, enabled  
390 through random forest regression against controls, bootstraps multiple single-endpoints to a robust DILI  
391 prediction score.

392 As we can generate iPSCs from patient PBMCs,<sup>64</sup> the 384-well format can be used to rapidly assess differential  
393 DILI risk per patient by screening a standard DILI drug library. Future studies will focus on developing a  
394 biobank of HLOs established from DILI patients thereby concentrating DILI genetics to a screenable number of  
395 patient lines that can be used as a predictive platform that can capture DILI risk with  $10^6$  enrichment over the  
396 general population. While high-throughput screening with dispersed HLOs in 384-well plates shows predictive  
397 power and can be used for large screening efforts, they suffer from lower CYP450 expression and lack of  
398 crucial hepatocyte function, both of which were mentioned as limitations in the original protocol for HLO  
399 culture.<sup>13</sup> While superior to hepatocellular carcinoma cell lines, the observed  $IC_{50}$  values for HLOs loss of cell  
400 viability are much higher than the achievable *in vivo*  $C_{max}$ . This is a limitation for preclinical assessment, as  
401 compounds appear less potent for producing DILI than *in vivo*, however, this may be compensated for through  
402 regression analysis.

403 Although PaDLOCs are less amenable to high-throughput screening of large small-molecule libraries, the  
404 enhancements in drug metabolism and hepatocyte function warrant its use in late-stage preclinical development

405 that does not necessitate high-throughput screening. The presence of CYP expression in PaDLOCs results in  
406 significant advantages for DILI risk prediction, as they can be used to observe effects of Phase 1/Phase 2  
407 metabolites in addition to the parent compound. This is apparent in APAP-induced toxicity in PaDLOCs, as  
408 hepatotoxicity is only caused by metabolite NAPQI by CYP2E1 conversion.<sup>65</sup> Hepatotoxic concentrations in  
409 cancer cell systems for APAP are generally in the millimolar concentration range where general xenobiotic  
410 cytotoxicity and promiscuous binding interfere with general cell health,<sup>66</sup> whereas HLOs sufficiently predict  
411 DILI risk at 10<sup>3</sup> lower concentrations where mechanistic dissection is tractable. This model was also able to  
412 reliably predict hepatotoxicity as caused by both FIAU and the tenofovir/inarigivir combination, both of which  
413 were not made apparent until the treatments reached clinical trials and caused severe hepatotoxicity in human  
414 subjects.<sup>7,67</sup> Future efforts will also include building a diverse library of PaDLOCs from idiosyncratic DILI  
415 patients towards the development of a co-culture system with immune cells to capture inflammatory and auto-  
416 immune modulation of DILI. High-throughput screening can be performed on large drug screening libraries to  
417 tabulate DILI risk to help guide drug development and also to provide robust data sets to improve AI/ML  
418 computational prediction of DILI risk.

419 The integration of scRNAseq, shown here as a proof-of-concept for liver chip systems, can provide detailed  
420 single-cell transcriptomic data that can illuminate the mechanism of action. Herein, we present a unified multi-  
421 omics platform that delivers integrated biochemical endpoints (ALT/AST/Albumin/P450), high content imaging  
422 to robustly determine drug hepatocellular toxicity, morphologic cell profiling to generate single-cell phenotypic  
423 fingerprints in response to sub-toxic concentrations of drugs and single-cell transcriptomics to characterize  
424 significant phenotypic perturbations. This platform demonstrates significant advantages over conventional pre-  
425 clinical DILI models and can be used to de-risk novel molecular entities, potentially stratify DILI patients by

426 their drug responsiveness, and create model systems for distinct DILI subtypes for use in phenotypic drug  
427 discovery towards chemoprotective therapies.

## 428 **Acknowledgements**

429 Funding: JZS is supported by the National Institute of Diabetes and Digestive and Kidney Diseases  
430 (R01DK120623) and University of Michigan Institute for Clinical and Health Research (MICHR) (NCATS -  
431 UL1TR002240). CJZ is supported by a Rackham Merit Fellowship and SRM by pharmacological sciences  
432 training program (PSTP) T32 training grant. Transcriptomics was supported by the University of Michigan  
433 Center of Gastrointestinal Research (UMCGR) Single Cell Pilot Grant (5 P30 DK034933).

434 The authors would like to thank Emulate Inc. for assistance with experimental design. We thank Kevin Jan,  
435 Peyton Uhl, and Cassandra Rogers at Yokogawa for microscopy support. We also thank Teresa O'Meara for  
436 writing assistance and proofreading, and Carmen Mirabelli, Mack Reynolds, and Bishr Omary for thoughtful  
437 advice.

438

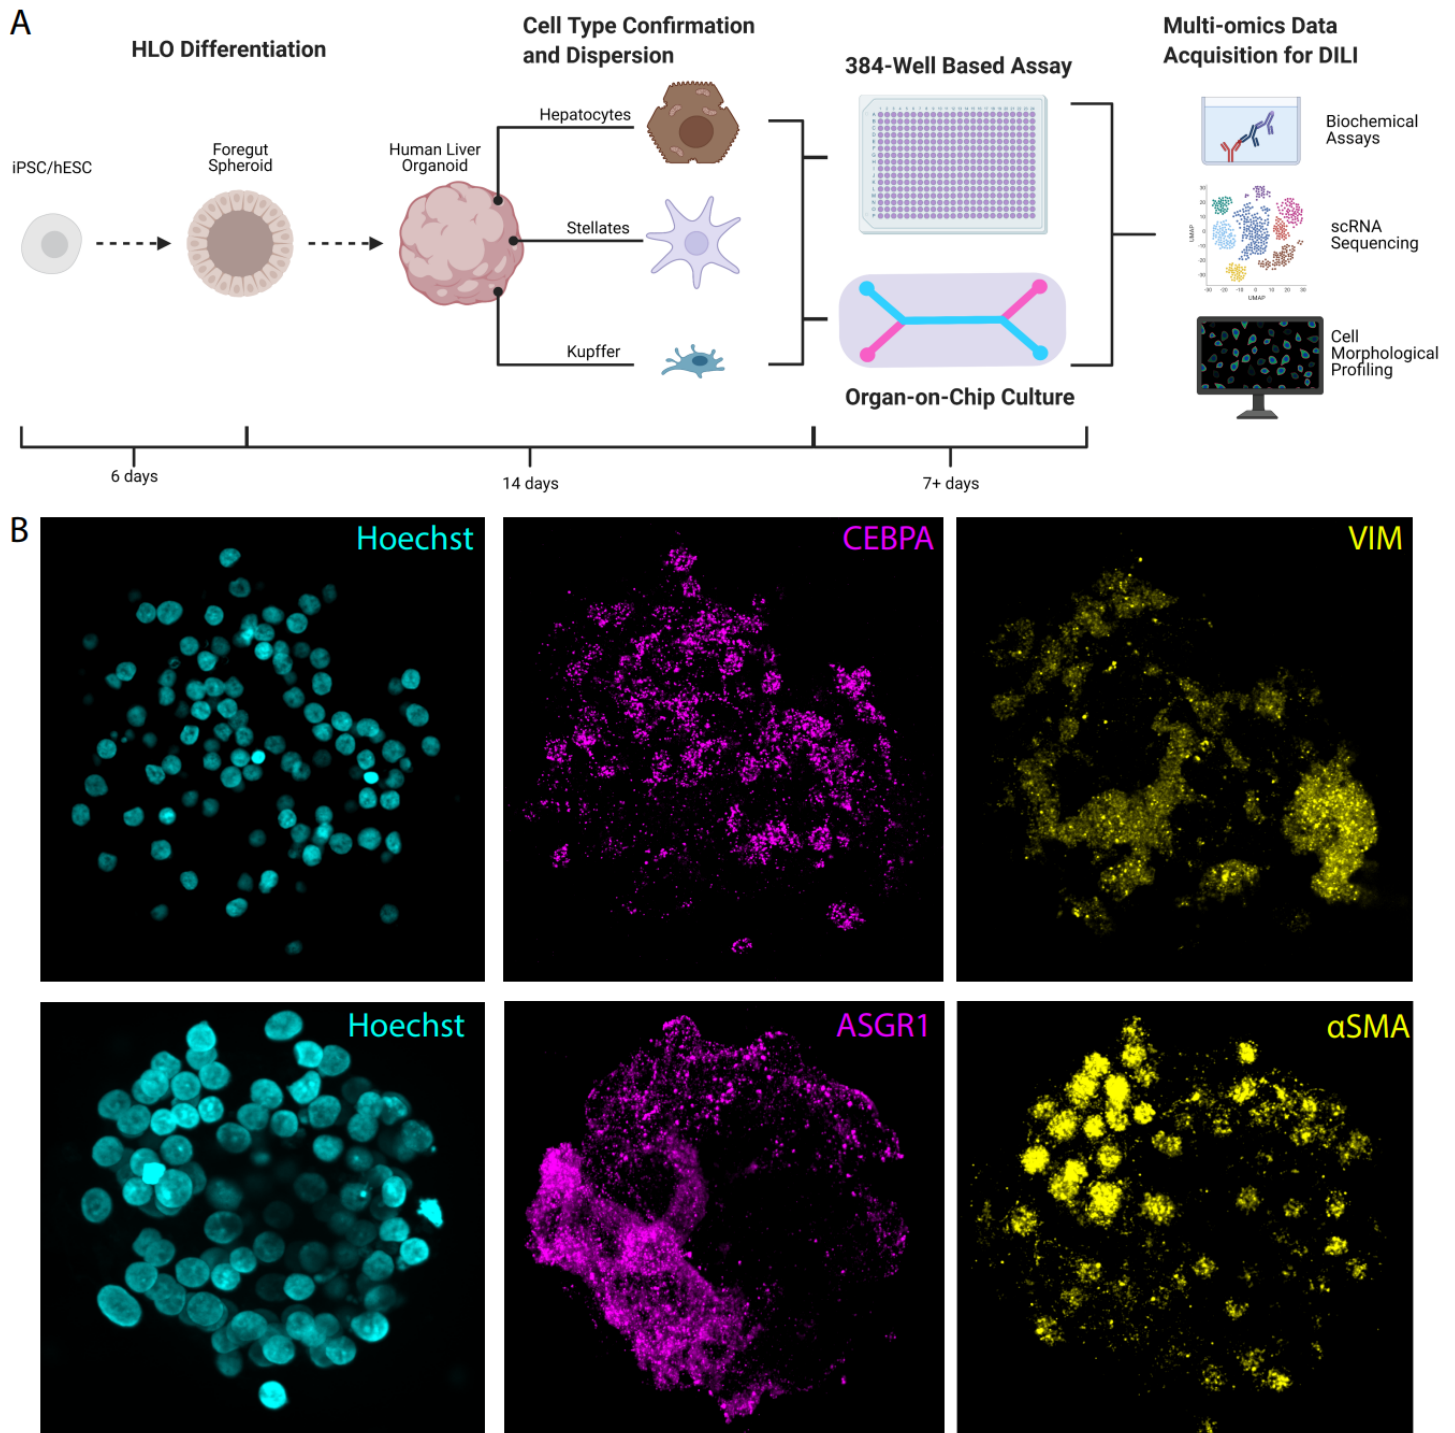

439

440

441

**Figure 1.** (A) Outline of the HLO differentiation process followed by disruption and dispersion of the organoid to plate in 384-well plates and a chip system for acquisition of biochemical, transcriptomic, and morphological

442 endpoints. (B) Confocal images of HLOs stained for nuclei, hepatocyte markers (CEBPA and HNF4A) and  
443 stellate markers (VIM and ACTA) for confirmation of the presence of cell types.

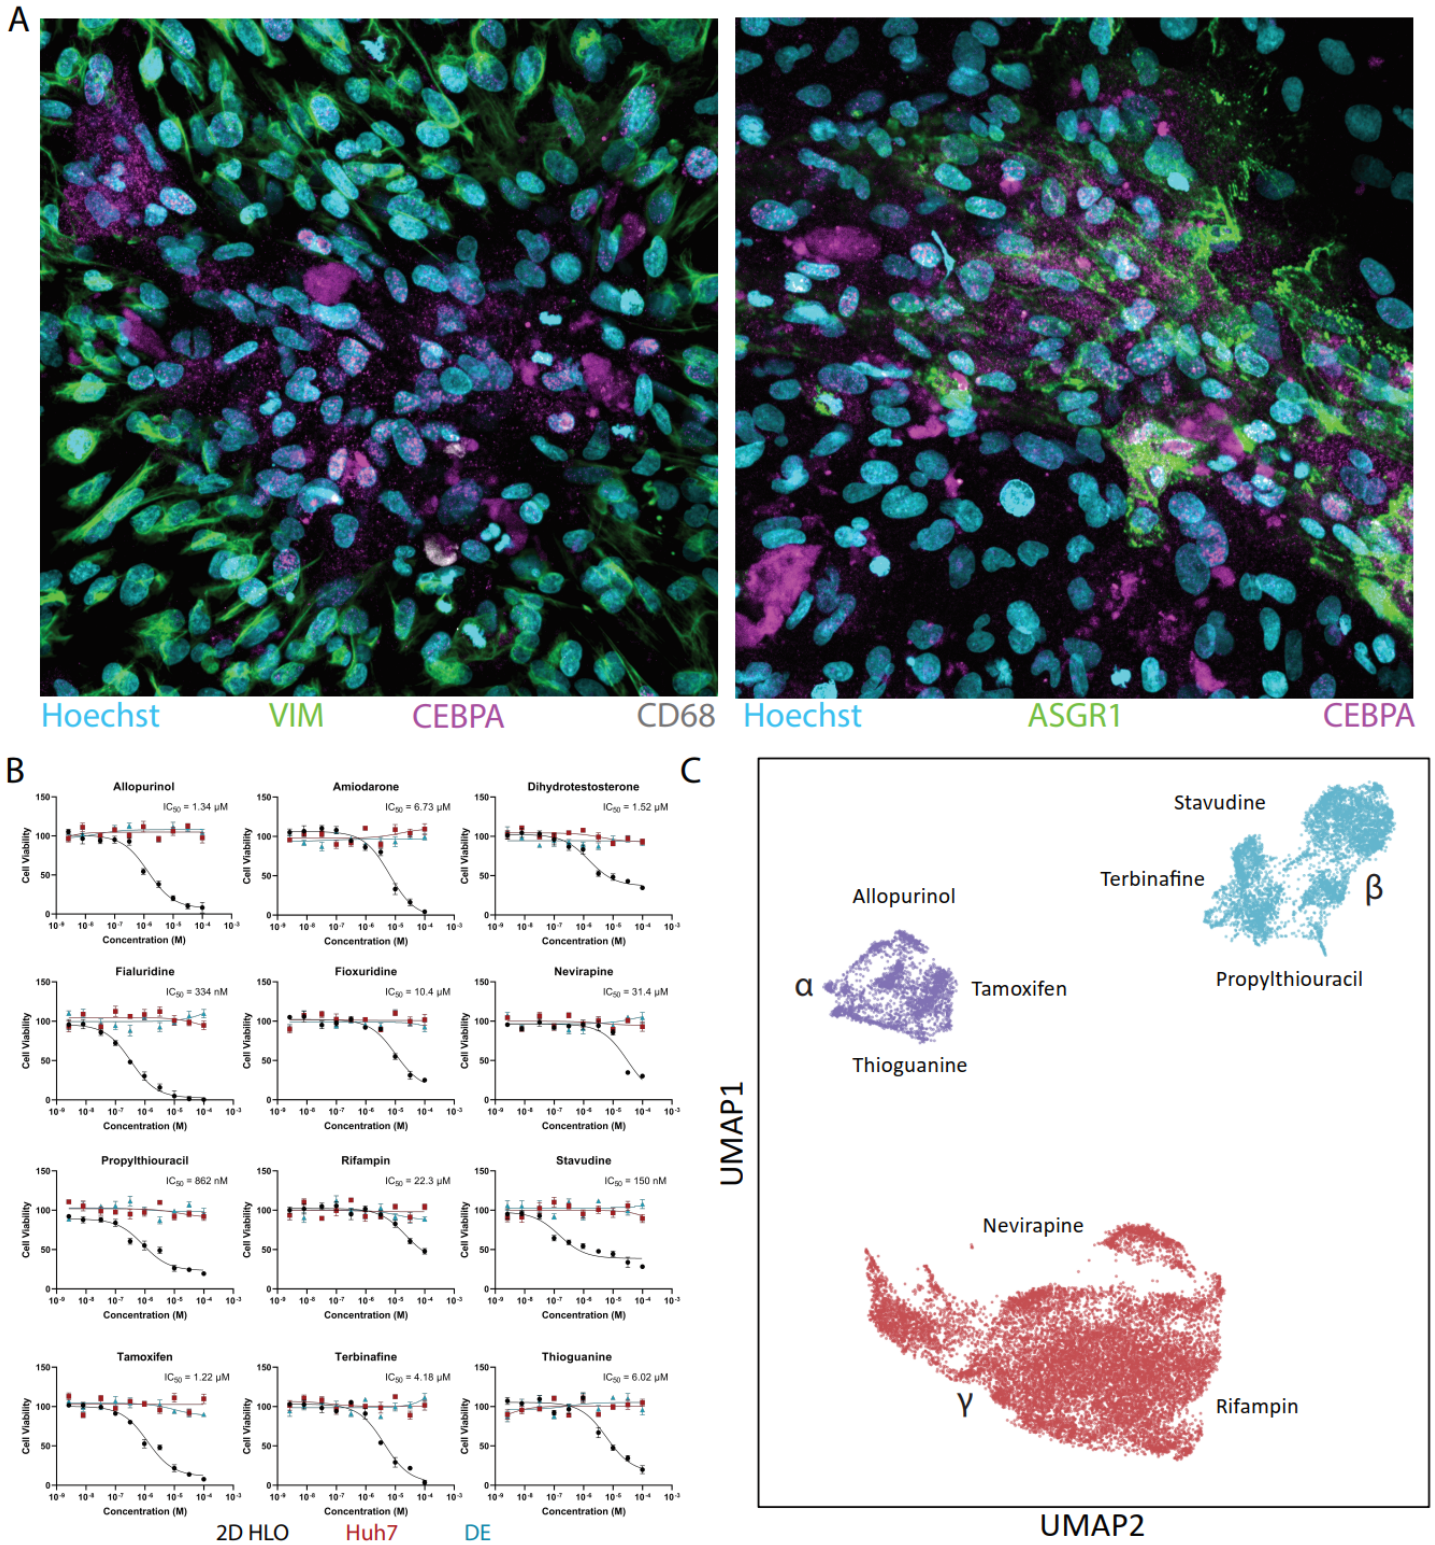



445 **Figure 2.** (A) HLOs disrupted and cultured in 384-well plates maintain expression of hepatocyte, stellate, and  
446 Kupffer cell markers. (B) Cell viability of 384-well cultures (black) treated with 12 known DILI-causing  
447 compounds in 10-point dose-response. Compounds were counter screened in immortalized cell line Huh7 (red)  
448 and definitive endoderm (blue) as controls. Plot points represent mean  $\pm$  SD (n=4 per concentration, per cell  
449 line) (C) Cells treated at each compound's respective IC<sub>50</sub> value stained with Hoechst 33342, MitoView Green,  
450 HCS CellMaskOrange, and LipidTox DeepRed were embedded into UMAP.

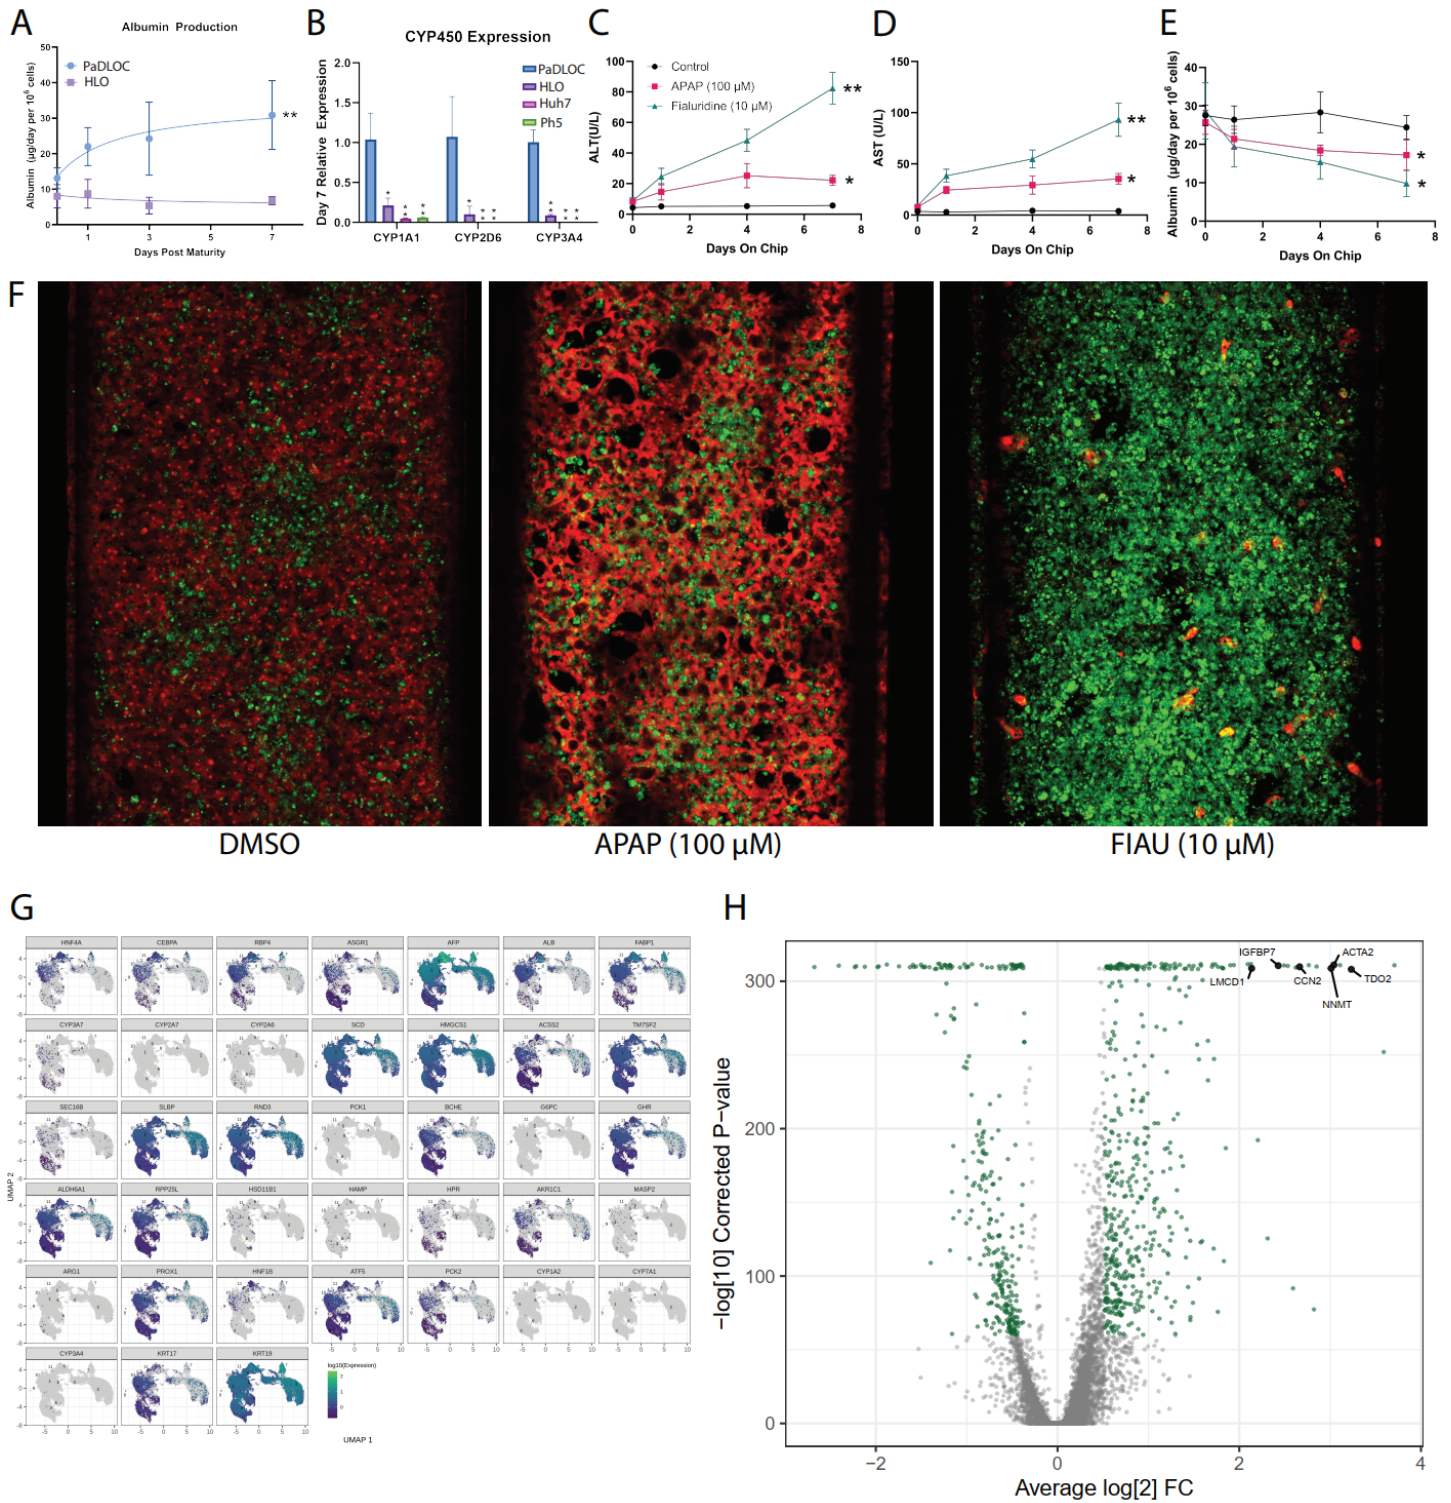

452 **Figure 3.** HLOs are disrupted into single-cell suspension and cultured on the Emulate Bio Chip-S1 for 7 days.  
453 (A) Albumin released in PaDLOCs is identical to that of intact HLOs at day 0 but increases over 7 days (day  
454 21-28 of differentiation). (B) Relative expression of select CYP450s between PaDLOCs, intact HLO, and  
455 immortalized hepatocyte cell lines Huh7 and Ph5. (C) Cells are treated with DMSO control and known  
456 hepatotoxins APAP (100  $\mu$ M) and FIAU (1  $\mu$ M). PaDLOCs demonstrated both ALT (D) and AST release and  
457 (E) albumin production diminishment across 7 days. (F) Confocal images of PaDLOCs at day 7 of treatment  
458 stained with CellMask Orange (shown in red) and LipidTOX Deep Red (colored green). Bars and plot points  
459 represent mean  $\pm$  SD (n=3 PaDLOC chips and n=3 intact HLO wells). (G) UMAP embedding of PaDLOCs  
460 with highlighted hepatocyte markers. (H) Volcano plot comparing gene differential expression between  
461 PaDLOC and HLOs with genes most upregulated in PaDLOC highlighted.

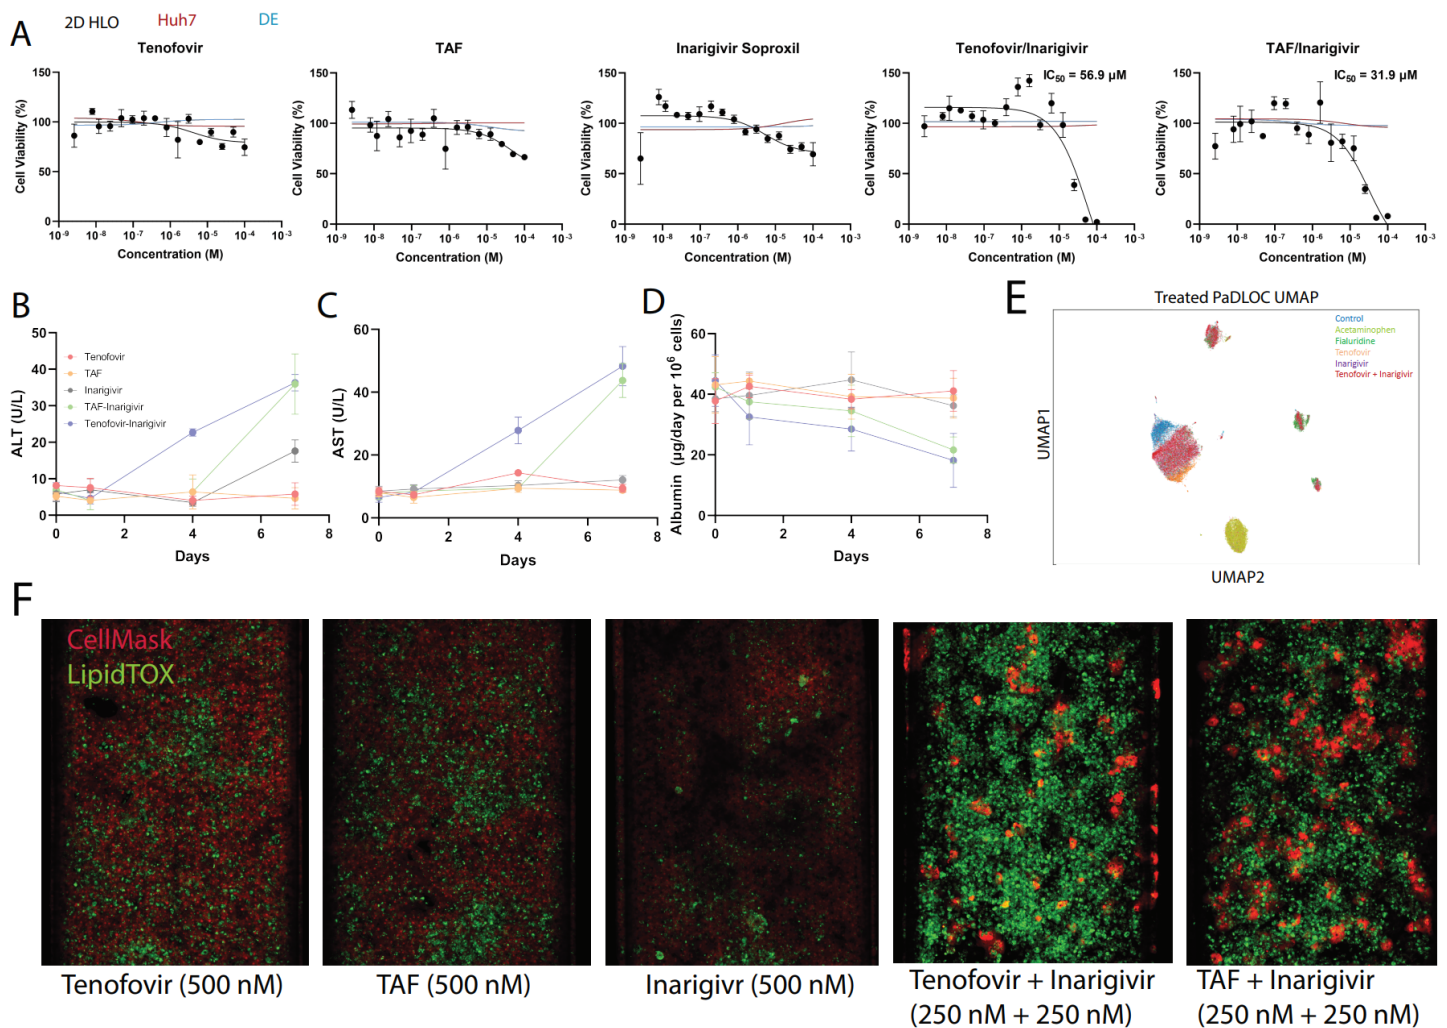

462

463

464

465

466

467

468

469

470

**Figure 4.** (A) Cell viability of 2D 384-well monolayer cultures of dispersed HLOs treated in 16-point dose-response with tenofovir, TAF, or inarigivir soproxil (n=4 per concentration) and measured IC<sub>50</sub>. (B) ALT, (C) AST, (D) and albumin released by PaDLOCs over 7 days of treatment with tenofovir (500 nM), TAF (500 nM), inarigivir soproxil (500 nM), tenofovir-inarigivir combination (250-250 nM), and TAF-inarigivir combination (250-250 nM) (n=3 chips per condition). Plot points represent mean ± SD. (E) PaDLOCs treated with DMSO control, individual agents, combinations, APAP, and FIAU were stained with Hoechst 33342, CellMask Orange, and LipidTOX Deep Red. CellProfiler 4.2.0 was used to extract cell-level features to embed into UMAP. (F) Representative images of treated PaDLOCs.

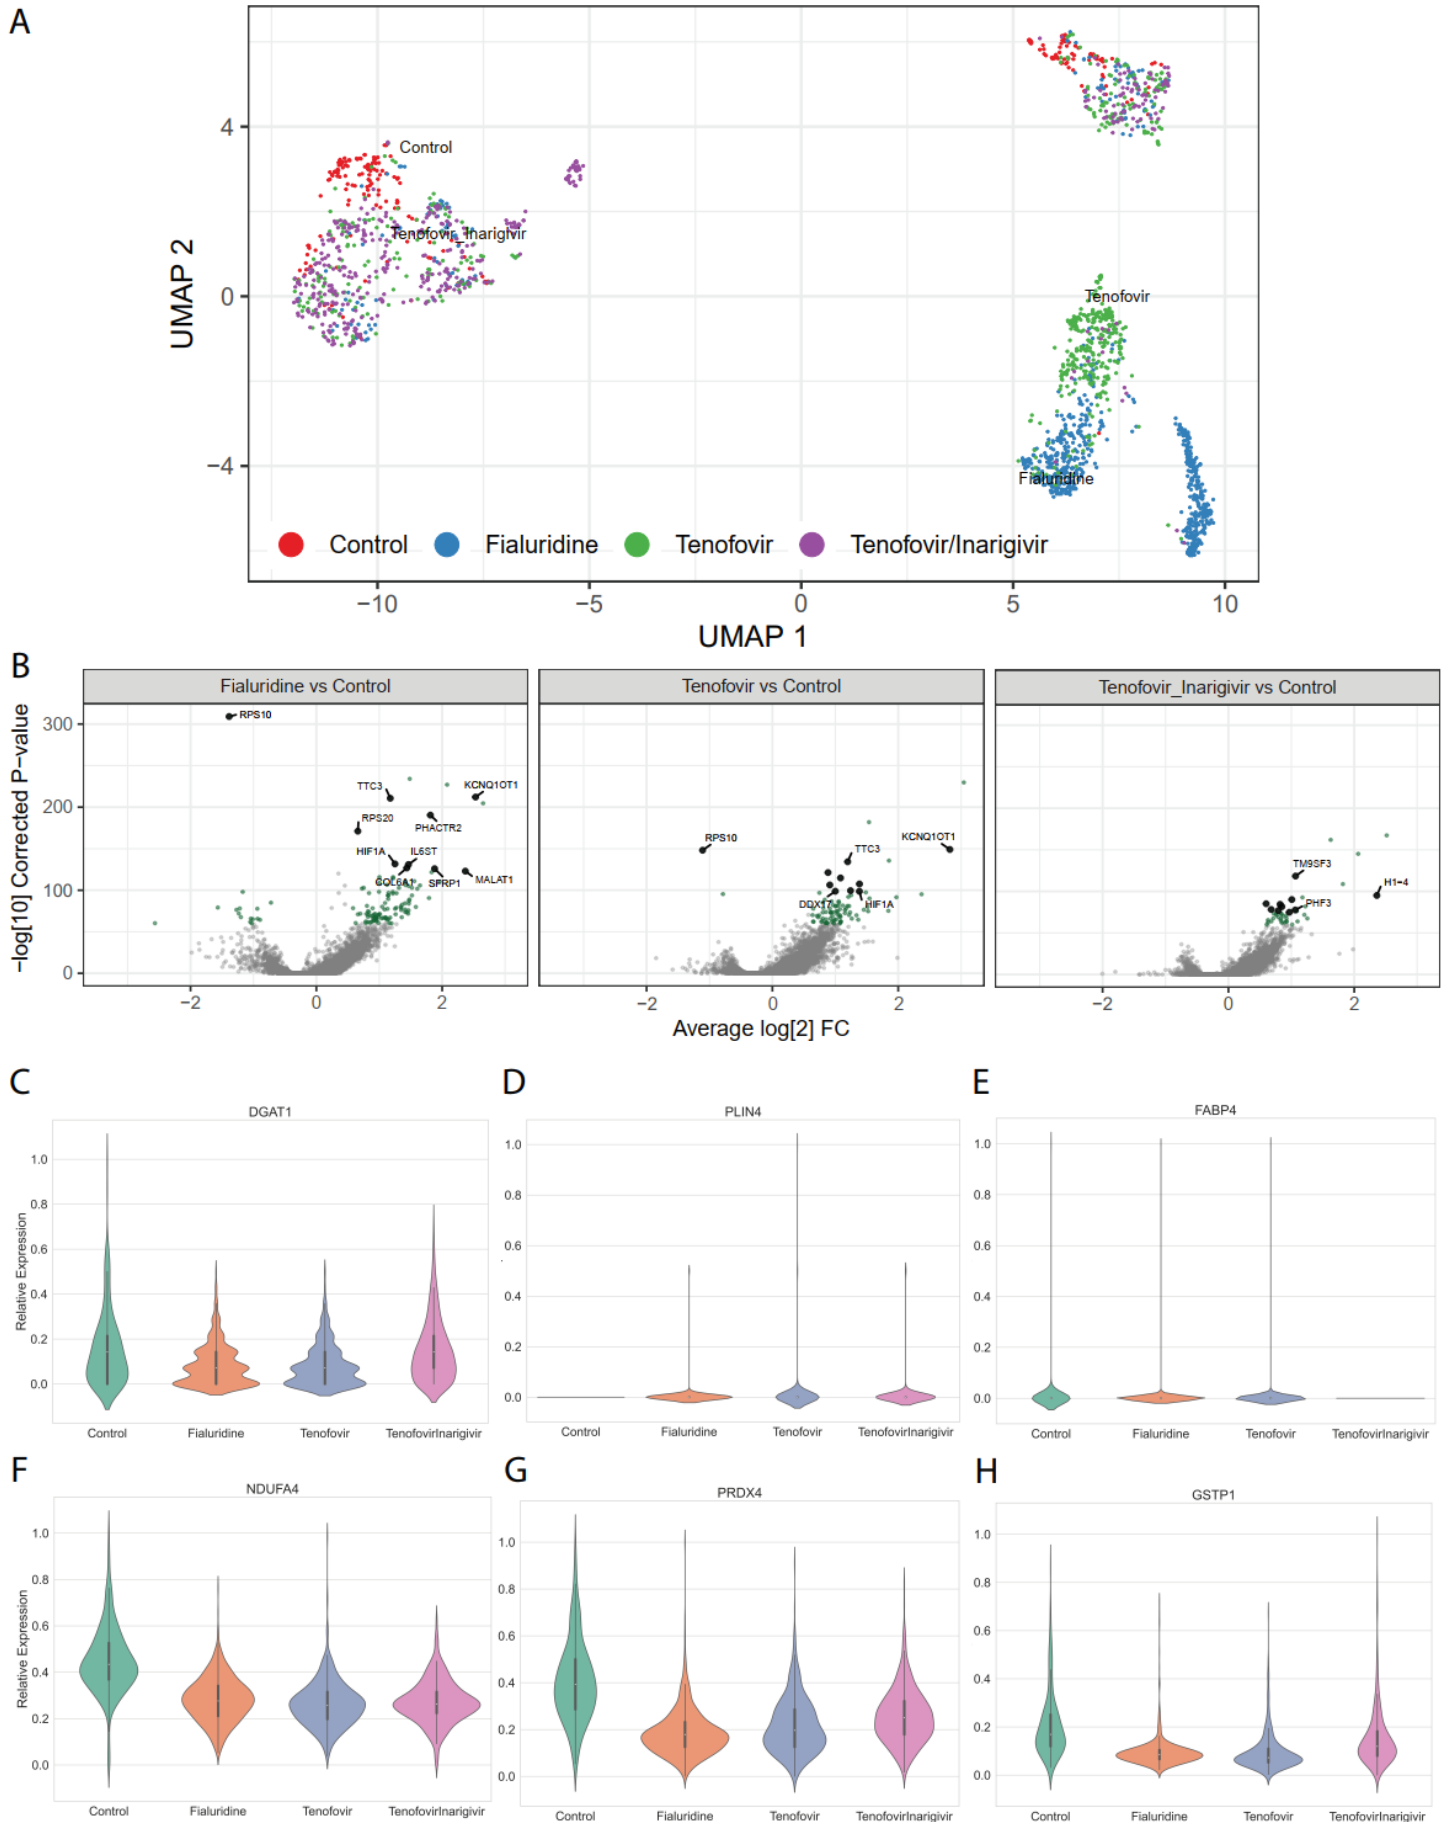

472 **Figure 5.** (A) Hepatocytes across treatments are identified and subset through marker expression and  
473 embedded into a UMAP to visualize similarities between treatments. (B) Volcano plots highlighting significant  
474 differential expression between control and drug treatments (>0 designates higher expression in treatment). (C-  
475 H) Relative expression of genes in vehicle control, fialuridine, tenofovir, and tenofovir-inarigivir treated  
476 PaDLOCs.

## 477 References

- 478 1. Fontana RJ, Watkins PB, Bonkovsky HL, et al. Drug-Induced Liver Injury Network (DILIN)  
479 prospective study: rationale, design and conduct. *Drug Saf* 2009;32:55–68.
- 480 2. Fontana RJ, Seeff LB, Andrade RJ, et al. Standardization of nomenclature and causality  
481 assessment in drug-induced liver injury: summary of a clinical research workshop. *Hepatology*  
482 2010;52:730–742.
- 483 3. Bakke OM, Manocchia M, Abajo F de, et al. Drug safety discontinuations in the United  
484 Kingdom, the United States, and Spain from 1974 through 1993: a regulatory perspective. *Clin Pharmacol*  
485 *Ther* 1995;58:108–117.
- 486 4. Watkins PB. Drug safety sciences and the bottleneck in drug development. *Clin Pharmacol Ther*  
487 2011;89:788–790.
- 488 5. Gindi R, National Center for Health Statistics (U.S.). Health, United States, 2019. 2021.  
489 Available at: <http://dx.doi.org/10.15620/cdc:100685>.
- 490 6. Yuen M-F, Elkashab M, Chen C-Y, et al. Dose response and safety of the daily, oral RIG-I  
491 agonist Inarigivir (SB 9200) in treatment naïve patients with chronic hepatitis B: results from the 25mg and  
492 50mg cohorts in the ACHIEVE trial. *Journal of Hepatology* 2018;68:S509–S510. Available at:  
493 [http://dx.doi.org/10.1016/s0168-8278\(18\)31267-4](http://dx.doi.org/10.1016/s0168-8278(18)31267-4).
- 494 7. Kosh Agarwal, Nezam Afdhal, Carla Coffin, Scott Fung, Geoffrey Dusheiko, Graham Foster,  
495 Magdy Elkhatab, Edward Tam, Alnoor Ramji, Radhakrishnan Iyer, Patrick Kennedy. Liver toxicity in the  
496 Phase 2 Catalyst 206 trial of inarigivir 400mg daily added to a nucleos(t)ide in HBeAg negative patients.  
497 2020.
- 498 8. Gomez-Lechon MJ, Donato MT, Lahoz A, et al. Cell Lines: A Tool for In Vitro Drug  
499 Metabolism Studies. *Curr Drug Metab* 2008;9:1–11.
- 500 9. Jeffries RE, Gamesik MP, Keshari KR, et al. Effect of Oxygen Concentration on Viability and  
501 Metabolism in a Fluidized-Bed Bioartificial Liver Using <sup>31</sup>P and <sup>13</sup>C NMR Spectroscopy. *Tissue Eng*

502 Part C Methods 2013;19:93–100.

503 10. Stéphane X, Najimi M, Sokal EM. Hepatocyte cryopreservation: is it time to change the  
504 strategy? *World J Gastroenterol* 2010;16:1–14.

505 11. Olson H, Betton G, Robinson D, et al. Concordance of the toxicity of pharmaceuticals in humans  
506 and in animals. *Regul Toxicol Pharmacol* 2000;32:56–67.

507 12. Jang K-J, Otieno MA, Ronxhi J, et al. Reproducing human and cross-species drug toxicities  
508 using a Liver-Chip. *Sci Transl Med* 2019;11. Available at: <http://dx.doi.org/10.1126/scitranslmed.aax5516>.

509 13. Thompson WL, Takebe T. Generation of multi-cellular human liver organoids from pluripotent  
510 stem cells. *Methods Cell Biol* 2020;159:47–68.

511 14. Ouchi R, Togo S, Kimura M, et al. Modeling Steatohepatitis in Humans with Pluripotent Stem  
512 Cell-Derived Organoids. *Cell Metab* 2019;30:374–384.e6.

513 15. Sheyn D, Cohn-Yakubovich D, Ben-David S, et al. Bone-chip system to monitor osteogenic  
514 differentiation using optical imaging. *Microfluid Nanofluidics* 2019;23. Available at:  
515 <http://dx.doi.org/10.1007/s10404-019-2261-7>.

516 16. McCracken KW, Catá EM, Crawford CM, et al. Modelling human development and disease in  
517 pluripotent stem-cell-derived gastric organoids. *Nature* 2014;516:400–404.

518 17. Sugawara S, Ito T, Sato S, et al. Production of an aminoterminally truncated, stable type of  
519 bioactive mouse fibroblast growth factor 4 in *Escherichia coli*. *J Biosci Bioeng* 2014;117:525–530.

520 18. Anon. *Liver-Chip Co-Culture Protocol*. Emulate Inc.; 2019. Available at:  
521 [https://emulatebio.com/wp-content/uploads/2021/06/EP008\\_v5.0\\_Liver-Chip\\_Co-Culture\\_Protocol.pdf](https://emulatebio.com/wp-content/uploads/2021/06/EP008_v5.0_Liver-Chip_Co-Culture_Protocol.pdf).

522 19. Frankish A, Diekhans M, Ferreira A-M, et al. GENCODE reference annotation for the human  
523 and mouse genomes. *Nucleic Acids Res* 2019;47:D766–D773.

524 20. Zheng GXY, Terry JM, Belgrader P, et al. Massively parallel digital transcriptional profiling of  
525 single cells. *Nat Commun* 2017;8:14049.

526 21. Duncan AW, Taylor MH, Hickey RD, et al. The ploidy conveyor of mature hepatocytes as a  
527 source of genetic variation. *Nature* 2010;467:707–710.

528 22. Choudhary S, Satija R. Comparison and evaluation of statistical error models for scRNA-seq.  
529 bioRxiv 2021. Available at: <https://www.biorxiv.org/content/10.1101/2021.07.07.451498.abstract>.

530 23. Hao Y, Hao S, Andersen-Nissen E, et al. Integrated analysis of multimodal single-cell data. *Cell*  
531 2021;184:3573–3587.e29.

532 24. Love MI, Huber W, Anders S. Moderated estimation of fold change and dispersion for RNA-seq  
533 data with DESeq2. *Genome Biol* 2014;15:550.

- 534 25. McInnes L, Healy J, Melville J. UMAP: Uniform Manifold Approximation and Projection for  
535 Dimension Reduction. arXiv [statML] 2018. Available at: <http://arxiv.org/abs/1802.03426>.
- 536 26. Cao J, Spielmann M, Qiu X, et al. The single-cell transcriptional landscape of mammalian  
537 organogenesis. *Nature* 2019;566:496–502.
- 538 27. Melville J, Lun A, Djekidel MN. uwot: The uniform manifold approximation and projection  
539 (UMAP) method for dimensionality reduction. R package version 2020;15.
- 540 28. Traag VA, Waltman L, Eck NJ van. From Louvain to Leiden: guaranteeing well-connected  
541 communities. *Sci Rep* 2019;9:5233.
- 542 29. Becht E, McInnes L, Healy J, et al. Dimensionality reduction for visualizing single-cell data  
543 using UMAP. *Nat Biotechnol* 2018. Available at: <http://dx.doi.org/10.1038/nbt.4314>.
- 544 30. Berthold MR, Cebron N, Dill F, et al. KNIME: The Konstanz Information Miner. In: *Studies in*  
545 *Classification, Data Analysis, and Knowledge Organization (GfKL 2007)*. Springer; 2007.
- 546 31. Anon. How to use the Random Forest nodes. knime.com 2020. Available at:  
547 [https://hub.knime.com/knime/spaces/Examples/latest/04\\_Analytics%2F13\\_Meta\\_Learning%2F02\\_Learnin](https://hub.knime.com/knime/spaces/Examples/latest/04_Analytics%2F13_Meta_Learning%2F02_Learnin)  
548 [g\\_a\\_Random\\_Forest~Sim-pKlioDWrgj\\_T](https://hub.knime.com/knime/spaces/Examples/latest/04_Analytics%2F13_Meta_Learning%2F02_Learning_a_Random_Forest~Sim-pKlioDWrgj_T) [Accessed September 1, 2020].
- 549 32. McCracken KW, Howell JC, Wells JM, et al. Generating human intestinal tissue from  
550 pluripotent stem cells in vitro. *Nat Protoc* 2011;6:1920–1928.
- 551 33. Knolle P, Löhner H, Treichel U, et al. Parenchymal and nonparenchymal liver cells and their  
552 interaction in the local immune response. *Z Gastroenterol* 1995;33:613–620.
- 553 34. Fausther M, Pritchard MT, Popov YV, et al. Contribution of Liver Nonparenchymal Cells to  
554 Hepatic Fibrosis: Interactions with the Local Microenvironment. *BioMed Research International*  
555 2017;2017:1–4. Available at: <http://dx.doi.org/10.1155/2017/6824762>.
- 556 35. Shinozawa T, Kimura M, Cai Y, et al. High-Fidelity Drug-Induced Liver Injury Screen Using  
557 Human Pluripotent Stem Cell-Derived Organoids. *Gastroenterology* 2021;160:831–846.e10.
- 558 36. Haney SA. *High Content Screening: Science, Techniques and Applications*. John Wiley & Sons;  
559 2008.
- 560 37. Mirabelli C, Wotring JW, Zhang CJ, et al. Morphological cell profiling of SARS-CoV-2  
561 infection identifies drug repurposing candidates for COVID-19. *bioRxiv* 2020. Available at:  
562 <http://biorxiv.org/lookup/doi/10.1101/2020.05.27.117184>.
- 563 38. Carpenter AE, Jones TR, Lamprecht MR, et al. CellProfiler: image analysis software for  
564 identifying and quantifying cell phenotypes. *Genome Biol* 2006;7:R100.
- 565 39. McInnes L, Healy J, Astels S. hdbSCAN: Hierarchical density based clustering. *J Open Source*  
566 *Softw* 2017;2:205.



- 567 40. Dickson I. Multispecies liver-on-a-chip for improved drug toxicity testing. *Nat Rev*  
568 *Gastroenterol Hepatol* 2020;17:4.
- 569 41. Rachfal AW, Brigstock DR. Connective tissue growth factor (CTGF/CCN2) in hepatic fibrosis.  
570 *Hepatol Res* 2003;26:1–9.
- 571 42. Goulart E, Caires-Junior LC de, Telles-Silva KA, et al. Adult and iPS-derived non-parenchymal  
572 cells regulate liver organoid development through differential modulation of Wnt and TGF- $\beta$ . *Stem Cell*  
573 *Res Ther* 2019;10:258.
- 574 43. Rodansky ES, Johnson LA, Huang S, et al. Intestinal organoids: a model of intestinal fibrosis for  
575 evaluating anti-fibrotic drugs. *Exp Mol Pathol* 2015;98:346–351.
- 576 44. Ding Q, Ma Y, Lai S, et al. NNMT aggravates hepatic steatosis, but alleviates liver injury in  
577 alcoholic liver disease. *J Hepatol* 2021;74:1248–1250.
- 578 45. Allard JB, Duan C. IGF-Binding Proteins: Why Do They Exist and Why Are There So Many?  
579 *Front Endocrinol* 2018;9:117.
- 580 46. McGill MR. The past and present of serum aminotransferases and the future of liver injury  
581 biomarkers. *EXCLI J* 2016;15:817–828.
- 582 47. European Association for the Study of the Liver. Electronic address: [easloffice@easloffice.eu](mailto:easloffice@easloffice.eu),  
583 Clinical Practice Guideline Panel: Chair:, Panel members, et al. EASL Clinical Practice Guidelines: Drug-  
584 induced liver injury. *J Hepatol* 2019;70:1222–1261.
- 585 48. James LP, Letzig L, Simpson PM, et al. Pharmacokinetics of acetaminophen-protein adducts in  
586 adults with acetaminophen overdose and acute liver failure. *Drug Metab Dispos* 2009;37:1779–1784.
- 587 49. Dahlin DC, Miwa GT, Lu AY, et al. N-acetyl-p-benzoquinone imine: a cytochrome P-450-  
588 mediated oxidation product of acetaminophen. *Proc Natl Acad Sci U S A* 1984;81:1327–1331.
- 589 50. Honkoop P, Scholte HR, Man RA de, et al. Mitochondrial Injury Lessons from the Fialuridine  
590 Trial. *Drug Safety* 1997;17:1–7. Available at: <http://dx.doi.org/10.2165/00002018-199717010-00001>.
- 591 51. Krähenbühl S. Mitochondria: important target for drug toxicity? *J Hepatol* 2001;34:334–336.
- 592 52. Hinson JA, Roberts DW, James LP. Mechanisms of acetaminophen-induced liver necrosis.  
593 *Handb Exp Pharmacol* 2010:369–405.
- 594 53. Kleiner DE. Drug-induced liver injury: The hepatic pathologist's approach. *Gastroenterol Clin*  
595 *North Am* 2017;46:273–296.
- 596 54. Jones TR, Carpenter AE, Lamprecht MR, et al. Scoring diverse cellular morphologies in image-  
597 based screens with iterative feedback and machine learning. *Proc Natl Acad Sci U S A* 2009;106:1826–  
598 1831.

- 599 55. Villanueva CJ, Monetti M, Shih M, et al. Specific role for acyl CoA:Diacylglycerol  
600 acyltransferase 1 (Dgat1) in hepatic steatosis due to exogenous fatty acids. *Hepatology* 2009;50:434–442.
- 601 56. Griffin JD, Salter DM, Bowman T, et al. Role of Hepatic PLIN2 and PLIN4 in The Development  
602 of Western Type Diet Induced Hepatosteatosis. *The FASEB Journal* 2017;31:458.3–458.3.
- 603 57. Chiyonobu N, Shimada S, Akiyama Y, et al. Fatty Acid Binding Protein 4 (FABP4)  
604 Overexpression in Intratumoral Hepatic Stellate Cells within Hepatocellular Carcinoma with Metabolic  
605 Risk Factors. *The American Journal of Pathology* 2018;188:1213–1224. Available at:  
606 <http://dx.doi.org/10.1016/j.ajpath.2018.01.012>.
- 607 58. Thompson KJ, Austin RG, Nazari SS, et al. Altered fatty acid-binding protein 4 (FABP4)  
608 expression and function in human and animal models of hepatocellular carcinoma. *Liver Int*  
609 2018;38:1074–1083.
- 610 59. Laouirem S, Sannier A, Norkowski E, et al. Endothelial fatty liver binding protein 4: a new  
611 targetable mediator in hepatocellular carcinoma related to metabolic syndrome. *Oncogene* 2019;38:3033–  
612 3046.
- 613 60. Yang R, Castriota G, Chen Y, et al. RNAi-mediated germline knockdown of FABP4 increases  
614 body weight but does not improve the deranged nutrient metabolism of diet-induced obese mice. *Int J Obes*  
615 2011;35:217–225.
- 616 61. Pessayre D, Fromenty B, Berson A, et al. Central role of mitochondria in drug-induced liver  
617 injury. *Drug Metab Rev* 2012;44:34–87.
- 618 62. Yamada S, Guo X. Peroxiredoxin 4 (PRDX4): Its critical in vivo roles in animal models of  
619 metabolic syndrome ranging from atherosclerosis to nonalcoholic fatty liver disease. *Pathology*  
620 *International* 2018;68:91–101. Available at: <http://dx.doi.org/10.1111/pin.12634>.
- 621 63. Li T, Zhao X-P, Wang L-Y, et al. Glutathione S-transferase P1 correlated with oxidative stress in  
622 hepatocellular carcinoma. *Int J Med Sci* 2013;10:683–690.
- 623 64. Yu J, Vodyanik MA, Smuga-Otto K, et al. Induced pluripotent stem cell lines derived from  
624 human somatic cells. *Science* 2007;318:1917–1920.
- 625 65. Lee SST, Buters JTM, Pineau T, et al. Role of CYP2E1 in the Hepatotoxicity of Acetaminophen.  
626 *Journal of Biological Chemistry* 1996;271:12063–12067. Available at:  
627 <http://dx.doi.org/10.1074/jbc.271.20.12063>.
- 628 66. Nelson LJ, Navarro M, Treskes P, et al. Acetaminophen cytotoxicity is ameliorated in a human  
629 liver organotypic co-culture model. *Sci Rep* 2015;5:17455.
- 630 67. McKenzie R, Fried MW, Sallie R, et al. Hepatic failure and lactic acidosis due to fialuridine  
631 (FIAU), an investigational nucleoside analogue for chronic hepatitis B. *N Engl J Med* 1995;333:1099–  
632 1105.

633  
634

68. Dekkers JF, Alieva M, Wellens LM, et al. High-resolution 3D imaging of fixed and cleared organoids. *Nat Protoc* 2019;14:1756–1771.
